# Supplementary material
Source: PubMed Central journal article supplement (PMC3560482)
Supplement: ajtr0005-0021-f7.pdf [file ajtr0005-0021-f7.pdf]

## Heterogeneity of iPSC-derived endothelial cells

**Supplemental Table.** Genes analyzed for quantitative real time PCR

| Gene Name                                                         | Abbreviation | Gene Function                                                                                                                                                |
|-------------------------------------------------------------------|--------------|--------------------------------------------------------------------------------------------------------------------------------------------------------------|
| Tyrosine kinase with immunoglobulin-like and EGF-like domains 1   | Tie 1        | Angiopoietin receptor 1 binds to angiopoietin to promote angiogenesis                                                                                        |
| Tyrosine kinase with immunoglobulin-like and EGF-like domains 2   | Tie 2        | Angiopoietin receptor 2 binds to angiopoietin to promote angiogenesis                                                                                        |
| Chicken Ovalbumin upstream promoter (COUP) transcription factor 2 | CoupTFII     | Angiogenesis and heart development, expressed in venous ECs                                                                                                  |
| Delta like ligand 4                                               | Dll4         | Essential for formation of mature vasculature                                                                                                                |
| Endothelial nitric oxide synthase                                 | eNOS         | Generates NO in blood vessels, regulates vascular tone and interactions with circulating blood elements                                                      |
| Ephrin Class-B2                                                   | EphrinB2     | Mediates developmental events, marks arterial vessels                                                                                                        |
| Ephrin type-B receptor 4                                          | EphB4        | Vascular development in venous specification                                                                                                                 |
| Forkhead box protein 1                                            | FoxC1        | A family of transcription factors that regulate genes involved in cell growth, proliferation, differentiation, and longevity                                 |
| Forkhead box protein 2                                            | FoxC2        | As above                                                                                                                                                     |
| Jagged 1 protein                                                  | Jag1         | Regulates cell fate, pattern formation cell proliferation and differentiation;, especially during hematopoiesis, myogenesis, neurogenesis and vasculogenesis |
| Jagged 2 protein                                                  | Jag2         | As above                                                                                                                                                     |
| Hairy/enhancer-of-split related with YRPW motif protein 2         | Hey2         | Cardiovascular development                                                                                                                                   |
| Lymphatic vessel endothelial hyaluronan receptor                  | LYVE-1       | Hyaluronan transport and localization to the surfaces of lymphatic endothelium                                                                               |
| Nanog                                                             | Nanog        | Pluripotent transcription factor                                                                                                                             |
| Notch homolog 1                                                   | Notch1       | Controls cell fate decisions                                                                                                                                 |
| Notch homolog 4                                                   | Notch4       | Controls cell fate decisions                                                                                                                                 |
| Neuropilin1                                                       | Nrp1         | Receptor of VEGF for angiogenesis                                                                                                                            |
| Octamer-binding transcription factor 4                            | Oct4         | Pluripotent transcription factor                                                                                                                             |
| Platelet endothelial cell adhesion molecule-1                     | CD31         | Endothelial cell intracellular junction                                                                                                                      |
| Podoplanin                                                        |              | Regulation of lymphatic vascular formation and platelet aggregation                                                                                          |
| Prospero homeobox protein 1                                       | Prox1        | Induction of lymphatic endothelial cell phenotype                                                                                                            |
| SRY (sex determining region Y)-box 2                              | Sox2         | Pluripotent transcription factor, self-renewal of undifferentiated pluripotent stem cells                                                                    |
| Vascular endothelial cadherin                                     | CD144        | Maintenance of a restrictive endothelial barrier and integrity of endothelial intercellular junctions                                                        |
| VEGF receptor 2 (kinase insert domain receptor)                   | KDR          | VEGF receptor for control of vasculature development                                                                                                         |
| VEGF receptor 1                                                   | Flt1         | VEGF receptor for control of vasculature development                                                                                                         |
| von Willebrand factor                                             | vWF          | Functions as both an antihemophilic factor carrier<br>Participates in platelet-vessel wall interactions                                                      |
| 18S ribosomal RNA                                                 | 18S          | Used as internal control for all eukaryotic cells                                                                                                            |

# Heterogeneity of iPSC-derived endothelial cells

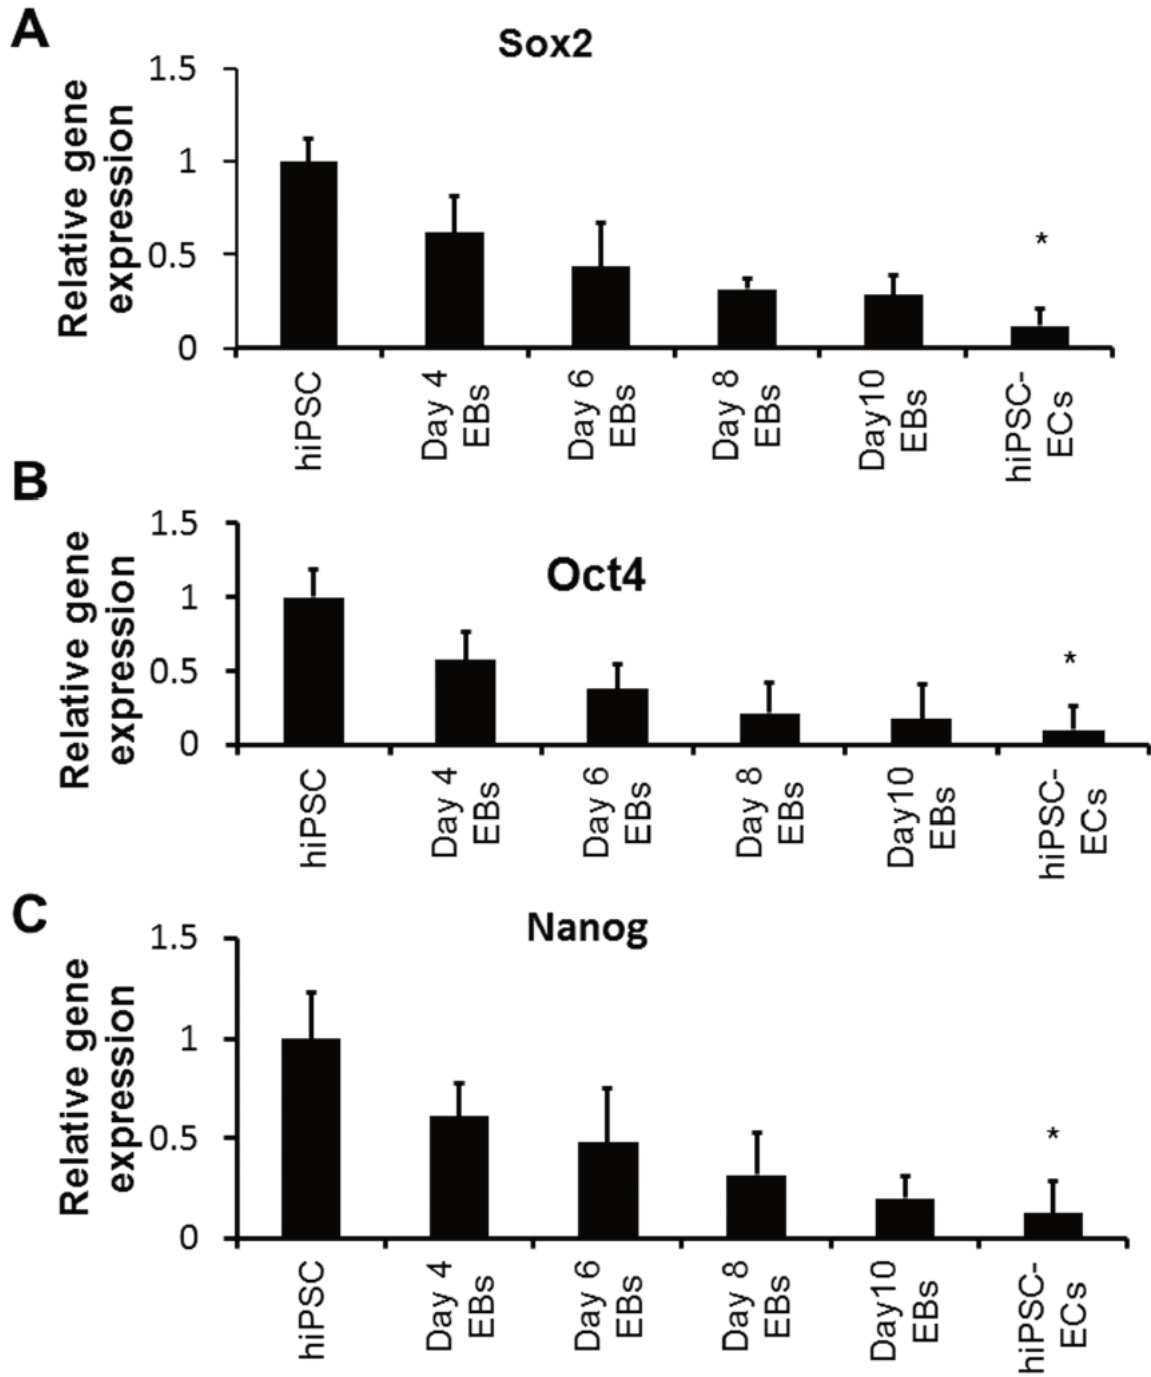

**Supplementary Figure 1.** Gene expression of pluripotent markers Sox2, Oct4 and Nanog decreased over time throughout the differentiation period. The isolated hiPSC-ECs expressed significantly lower levels of these pluripotent markers. \* $P < 0.05$  relative to hiPSCs.

Heterogeneity of iPSC-derived endothelial cells

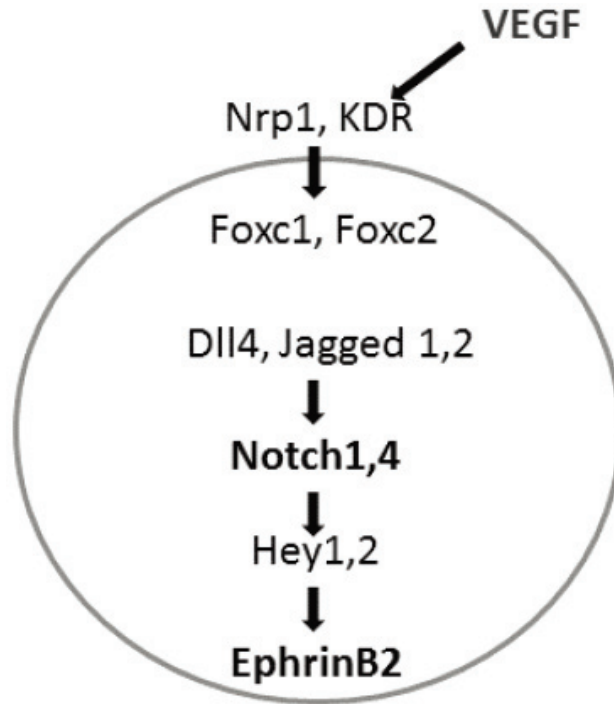

**Supplementary Figure 2.** Schematic of VEGF-Notch signaling pathway in directing arterial EC differentiation. Key signaling pathway members are listed.
